# Supplementary material for: Radical-driven nano-crystalline IrO 2 : resolving the activity-stability trade-off in acidic OER
Source: Royal Society of Chemistry journal article supplement (doi:10.1039/d5gc04748j), 2026-01-01
Supplement: d5gc04748j1.pdf [file d5gc04748j1.pdf]

## Supporting Information

### Radical-Driven Nano-Crystalline IrO<sub>2</sub>: Resolving the Activity-Stability Trade-Off in Acidic OER

Renxing Huang<sup>a, b #</sup>, Zeping Zhang<sup>b #</sup>, Chengcheng Sang<sup>b, c</sup>, Weitao Gao<sup>d</sup>, Yiming Bai<sup>b</sup>, Yinghe Huang<sup>a, b</sup>, Yuxing Shi<sup>a</sup>, Yonghuan Li<sup>a</sup>, Lianguo Sun<sup>b</sup>, Cheng Wang<sup>b\*</sup>,  
Jun Gu<sup>a\*</sup>, Tao Yu<sup>a\*</sup>

<sup>a</sup> School of Physics, Nanjing University, Nanjing, 210093, China;

<sup>b</sup> Division of New Energy Material and Chemical Engineering, INET, Tsinghua University, Beijing, 100084, China;

<sup>c</sup> College of Mechanical and Vehicle Engineering, Hunan University, Changsha 410082, China;

<sup>d</sup> College of Mechanical and Electrical Engineering, Central South University, Changsha, 410083, China

\*Corresponding authors. Email: wangcheng@tsinghua.edu.cn (C. W);  
junguca@nju.edu.cn (J. G); yutao@nju.edu.cn (T.Y)

## Chemicals

Hexachloroiridic acid ( $\text{H}_2\text{IrCl}_6 \cdot x\text{H}_2\text{O}$ ), hexachloroplatinic(IV) acid ( $\text{H}_2\text{PtCl}_6 \cdot x\text{H}_2\text{O}$ ), ruthenium(III) chloride ( $\text{RuCl}_3$ ), and potassium tetrachloropalladate ( $\text{K}_2\text{PdCl}_4 \cdot x\text{H}_2\text{O}$ ) were purchased from Changzhou Yiding Metal Co., Ltd. Hydrogen peroxide (30%  $\text{H}_2\text{O}_2$ ), Sodium bisulfite ( $\text{NaHSO}_3$ ), Sodium carbonate ( $\text{Na}_2\text{CO}_3$ ), Sodium hydroxide ( $\text{NaOH}$ ) and perchloric acid ( $\text{HClO}_4$ ) were purchased from Sinopharm Chemical Reagent Co., Ltd. Nafion® perfluorinated resin solution (5 wt%) from Sigma-Aldrich. Commercial 40% Pt/C was produced by TsingHydrogen Technology Co., Ltd. The commercial Iridium oxide ( $\text{IrO}_2$ ) catalyst was purchased from Heraeus (China). The batch number is 9016862119. All the chemicals and reagents were used without further purification.

## Characterization

Aberration-corrected high-angle annular dark-field scanning transmission electron microscopy (HAADF-STEM) was conducted using a Thermo Scientific Spectra 200 microscope with a cold-field emission gun operated at 200 kV. Prior to imaging, the catalyst powders were ultrasonically dispersed in ethanol for 30 min, and a drop of the suspension was deposited onto a lacey carbon-coated Cu grid and dried under ambient conditions.

Conventional TEM and high-resolution TEM (HRTEM) were performed on an FEI Talos F200X instrument operated at 200 kV. Energy-dispersive X-ray spectroscopy (EDS) was conducted using the same microscope equipped with a Super-X EDS system comprising four windowless silicon drift detectors (SDDs) for high-efficiency elemental mapping. Samples were prepared by dispersing the powdered material in ethanol, drop-casting onto carbon-coated Cu grids, and drying in air.

UV-vis absorption spectra were acquired using a Mini-1200 spectrophotometer in the 300-700 nm range. Liquid samples were measured in quartz cuvettes with an optical path length of 1 cm. The reaction solution during the reaction process is directly tested after being diluted with ultrapure water.

X-ray diffraction (XRD) patterns were recorded on a Bruker D8 Advance diffractometer using Cu K $\alpha$  radiation ( $\lambda = 1.5406 \text{ \AA}$ ), scanned at  $5^\circ \text{ min}^{-1}$  from  $10^\circ$  to  $90^\circ$  ( $2\theta$ ). Samples were gently ground in an agate mortar and evenly spread on a low-background silicon sample holder before measurement.

X-ray photoelectron spectroscopy (XPS) was carried out on a Thermo Scientific K-Alpha spectrometer with monochromatic Al K $\alpha$  radiation ( $h\nu = 1486.8 \text{ eV}$ ). The powders were pressed onto conductive carbon tape and mounted on the sample stage; binding energies were calibrated using the C 1s peak at  $284.8 \text{ eV}$ .

Electron paramagnetic resonance (EPR) spectra were collected using a JEOL JES-FA200 spectrometer. The reaction solution during the reaction process were loaded into quartz EPR tubes and sealed prior to measurement.

Elemental analysis was conducted using inductively coupled plasma optical emission spectrometry (ICP-OES, PerkinElmer Optima 8300). For ICP analysis, during the durability test,  $2 \text{ mL}$  of the reaction solution was directly taken and diluted to  $5 \text{ mL}$  with ultrapure water, then directly tested.

X-ray absorption spectroscopy (XAS), including X-ray absorption near-edge structure (XANES) and extended X-ray absorption fine structure (EXAFS), was performed at the BL14W1 beamline of the Shanghai Synchrotron Radiation Facility (SSRF). The storage ring operated at  $3.5 \text{ GeV}$  with a typical current of  $220\text{-}260 \text{ mA}$ . A Si(111) double-crystal monochromator was used for energy selection. The incident ( $I_0$ ) and transmitted ( $I_t$ ) X-ray intensities were monitored using ionization chambers filled with  $\text{N}_2/\text{He}$  mixtures optimized for the Ir  $L_3$ -edge. Powder samples were thoroughly mixed with boron nitride (BN) and pressed into pellets (diameter  $10 \text{ mm}$ ) to obtain an edge step of approximately  $\Delta\mu x \approx 1$ . All measurements were collected in transmission mode at room temperature. The energy scale was calibrated using an Ir foil reference simultaneously measured, with the Ir  $L_3$ -edge set to  $11215 \text{ eV}$ . Data reduction and EXAFS fitting were carried out using the Demeter package (Athena and Artemis). Background subtraction, normalization, and Fourier transforms were performed

following standard procedures, with  $k^3$ -weighting applied to EXAFS  $\chi(k)$  functions.

### **Electrochemical measurements for a three-electrode system**

The oxygen evolution reaction (OER) electrocatalytic performance was evaluated using a CHI 660E electrochemical workstation (CH Instruments, Inc.) in a standard three-electrode system. Catalyst ink was prepared by ultrasonically dispersing 4 mg catalyst powder in a mixed solvent containing 600  $\mu\text{L}$  isopropanol, 400  $\mu\text{L}$  ultrapure water, and 20  $\mu\text{L}$  Nafion® solution (5 wt%) for 1 h. Subsequently, 6  $\mu\text{L}$  of the well-dispersed ink was drop-cast onto a mirror-polished glassy carbon electrode (GCE, 4 mm diameter), followed by natural drying under ambient conditions.

Electrochemical measurements were conducted using a rotating disk electrode (RDE) at 1600 rpm in 0.1 M  $\text{HClO}_4$  electrolyte. A platinum wire and an Ag/AgCl (saturated KCl) electrode were used as the counter and reference electrodes, respectively. A glassy carbon RDE (4 mm diameter) served as the working electrode. All potentials were converted to the reversible hydrogen electrode (RHE) scale. Linear sweep voltammetry (LSV) scans were performed from 1.2 to 1.7 V vs. RHE at a scan rate of 5  $\text{mV s}^{-1}$  with 100% iR-compensated. All potentials and converted to the RHE scale according to the following equation:

$$E_{\text{vs. RHE}} = E_{\text{vs. Ag/AgCl}} + 0.244 \text{ V} + 0.059 \text{ pH} \quad (1)$$

where 0.244 V is the potential difference between the Ag/AgCl (saturated KCl) reference electrode and the RHE in 0.1 M  $\text{HClO}_4$ .

Electrochemical impedance spectroscopy (EIS) measurements were conducted at 1.5 V vs. RHE with the frequency range of 100 kHz to 0.01 Hz. Catalyst durability was assessed via chronopotentiometry (CP) at a constant current density of 10  $\text{mA cm}^{-2}$  on a carbon paper electrode (geometric area: 1  $\text{cm}^2$ ).

The S-number, a stability descriptor defined as the ratio of evolved  $\text{O}_2$  to dissolved metal ions, was calculated using:

$$S - number = \frac{n_{O_2}}{n_{Ir}(dissolved)} \quad (2)$$

Where  $n_{O_2}$  is the molar number of  $O_2$  produced, assuming 100% Faradaic efficiency, and  $n_{Ir}$  is determined via ICP-MS.

The turnover frequency (TOF) at 1.53 V (vs. RHE) was calculated assuming the Faradaic efficiency of 100% according to Equation (3):

$$TOF = \frac{J \times A}{4 \times F \times M} \quad (3)$$

Where  $J$  is the current density ( $mA\ cm^{-2}$ ),  $A$  is the geometric area of the work electrode,  $F$  is the Faraday constant ( $96485\ C\ mol^{-1}$ ),  $m$  is the mole number of metal on the electrode, and 4 is the number of electrons involved in forming one  $O_2$  molecule.

### **Electrochemical measurements in PEM electrolyser**

Proton exchange membrane water electrolyzer (PEMWE) tests were performed to assess the practical applicability of the catalysts. Membrane electrode assemblies (MEAs) were fabricated by ultrasonic spray-coating catalyst inks onto both sides of a Nafion 115 membrane.  $IrO_2$  (Sub-2 nm) or commercial  $IrO_2$  was used as the anode catalyst ( $0.3\ mg\ cm^{-2}$ ), and commercial Pt/C (40 wt%) as the cathode catalyst ( $0.1\ mg\ cm^{-2}$ ). Loadings were verified via X-ray fluorescence (XRF).

Catalyst inks were prepared by dispersing the catalyst in a water/isopropanol (2:8 v/v) solvent mixture containing Nafion ionomer (10 wt% for the anode, 35 wt% for the cathode). The inks were homogenized via probe sonication in an ice-water bath for 1 h.

The electrolyzer employed Pt-coated titanium felt as the anode porous transport layer (PTL) and carbon paper as the cathode gas diffusion layer, with an active area of  $25\ cm^2$ . PEM electrolyzer performance evaluation was carried out using deionized water as the reactant feed, and the cell temperature was maintained at  $80\ ^\circ C$ . Polarization curves of the PEM electrolyzer were collected in the voltage range of 1.4-2.1 V using Gamry Instrument. Long-term stability assessment was performed via

chronopotentiometry at a constant current density of 1.0 A cm<sup>-2</sup>. The high-frequency resistance was measured in the frequency range of 100 kHz to 0.01 Hz at 1.50 V.

### (1) Overpotential analysis

The cell voltage ( $E_{\text{cell}}$ ) during PEMWE operation consists of four components:

$$E_{\text{cell}} = E_{\text{rev}}^0 + \eta_{\text{kin}} + \eta_{\text{ohm}} + \eta_{\text{mt}} \quad (1)$$

Where  $E_{\text{rev}}^0$  is the reversible potential,  $\eta_{\text{kin}}$ ,  $\eta_{\Omega}$ , and  $\eta_{\text{mt}}$  are the kinetic, ohmic, and mass transport overpotentials, respectively.

The temperature-dependent standard reversible potential,  $E_{\text{rev}}^0$ , is determined as

$$E_{\text{rev}} = E_{\text{rev}}^0 + \frac{RT}{2F} \ln \frac{a(\text{H}_2) \sqrt{a(\text{O}_2)}}{a(\text{H}_2\text{O})} \quad (2)$$

$R$  is the ideal gas constant,  $T$  is the temperature, and  $F$  is Faraday's constant. At 80 °C,  $a(\text{H}_2\text{O}) = 1$  and partial pressures of  $\text{H}_2$  and  $\text{O}_2$  at saturation, this yields the actual cell thermodynamic voltage.

$$E_{\text{rev}}^0 = 1.2291 - 0.0008456 \cdot (T - 298.15) \quad (3)$$

Ohmic overpotential was determined according to Equation (4):

$$\eta_{\text{ohm}} = j \times \text{HFR} \text{ (V)} \quad (4)$$

Where  $j$  is the current density (A cm<sup>-2</sup>), HFR is the high-frequency resistance obtained via EIS.

The kinetic overpotential was derived from Tafel fitting of the iR-corrected polarization curves between 4-20 mA cm<sup>-2</sup>:

$$\eta_{\text{kin}} = b \times \log \left( \frac{j}{j_0} \right) \text{ (V)} \quad (5)$$

Where  $b$  is the Tafel slope and  $j_0$  is the exchange current density.

Finally, the value of  $\eta_{\text{trans}}$  was obtained by Equation (6):

$$\eta_{\text{trans}} = E_{\text{ohmic-corrected}} - E_{\text{kin}} \text{ (V)} \quad (6)$$

## (2) The Construction of E-pH Diagrams

To construct the E-pH diagram, the following thermodynamic equations were applied:

(1) Gibbs free energy change for a reaction:

$$\Delta G^0(\text{reaction}) = \sum \Delta G^0(\text{products}) - \sum \Delta G^0(\text{reactants})$$

(2) Standard electrode potential from Gibbs free energy:

$$E^0 = \Delta G^0 / -96.49n$$

(3) Nernst equation for pH-dependent redox potentials:

$$E = E^0 - RT/nF \ln [(\text{products}) / (\text{reactants})]$$

Based on the description above, E-pH diagrams for the  $\text{IrO}_2/\text{Ir}(\text{OH})_6^{3-}$  redox pair were constructed based on thermodynamic data obtained from Lange's Handbook of Chemistry.

$$\Delta G^0(\text{IrO}_2) = -64.0 \text{ kJ mol}^{-1}, \Delta G^0(\text{Ir}(\text{OH})_6^{3-}) = -920.5 \text{ kJ mol}^{-1}, \Delta G^0(\text{H}_2\text{O}) = -237.2 \text{ kJ mol}^{-1}, \Delta G^0(\text{OH}^-) = -157.3 \text{ kJ mol}^{-1}, \Delta G^0(\text{H}^+) = 0 \text{ kJ mol}^{-1}$$

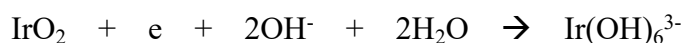

$$\begin{array}{ccccccc} -64.0 & & -157.3 \times 2 & & -237.2 \times 2 & & -920.5 \end{array}$$

$$\Delta G^0(\text{reaction}) = \sum \Delta G^0(\text{products}) - \sum \Delta G^0(\text{reactants})$$

$$\Delta G^0(\text{IrO}_2 / \text{Ir}(\text{OH})_6^{3-}) = -67.5 \text{ kJ mol}^{-1}$$

$$\Delta E^0 = \Delta G^0 / -96.49n = 0.70 \text{ V}$$

$$E = E^0 - RT/nF \log ([\text{products}] / [\text{reactants}])$$

$$= 0.70 - 0.0591/n \log([\text{Ir}(\text{OH})_6^{3-}] / [\text{OH}^-]^2)$$

$$= 0.70 - 0.0591/1 \{ \log([0.004] / [\text{OH}^-]^2) \}$$

$$= -0.811 + 0.118 \text{ pH}$$

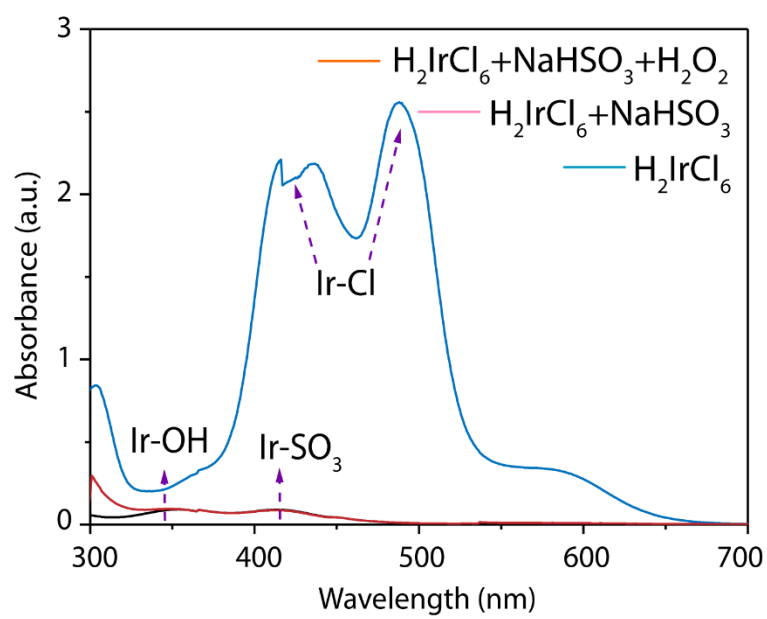

Fig. S1. UV-vis spectra of different chemicals in solution at room temperature.

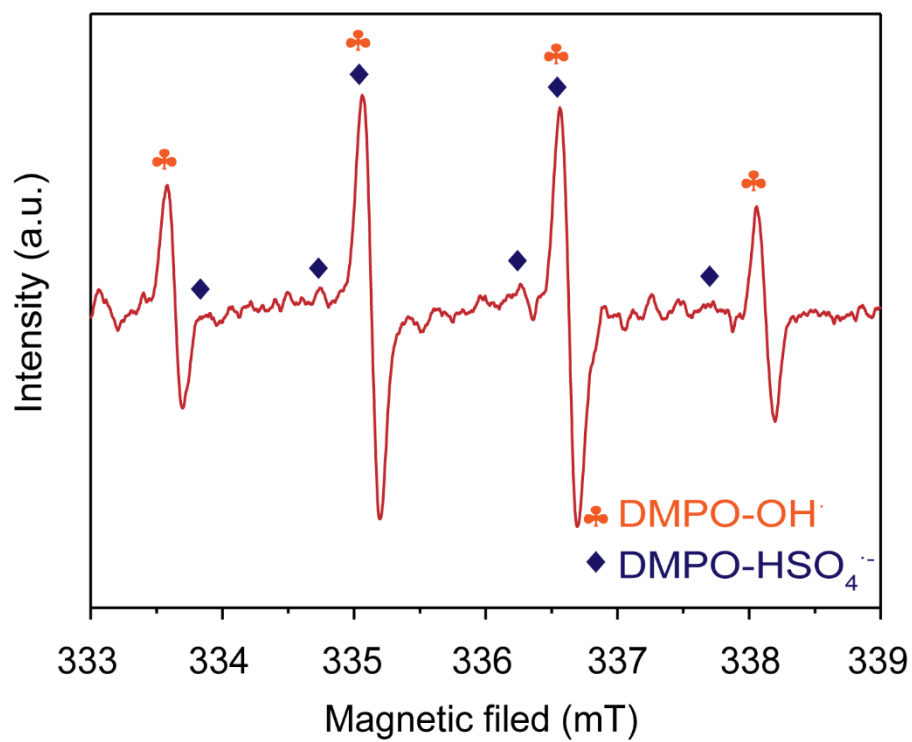

Fig. S2 EPR spectra confirming the presence of •OH radicals in NaHSO<sub>3</sub>-H<sub>2</sub>O<sub>2</sub> system via DMPO spin-trapping.

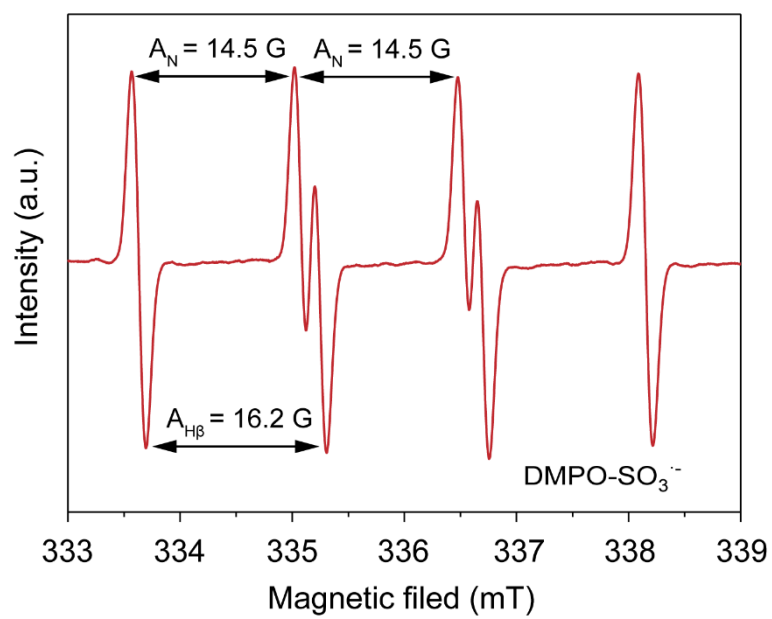

Fig. S3. DMPO spin-trapping EPR spectra of SO<sub>3</sub><sup>•-</sup> in the H<sub>2</sub>IrCl<sub>6</sub>-NaHSO<sub>3</sub> systems.

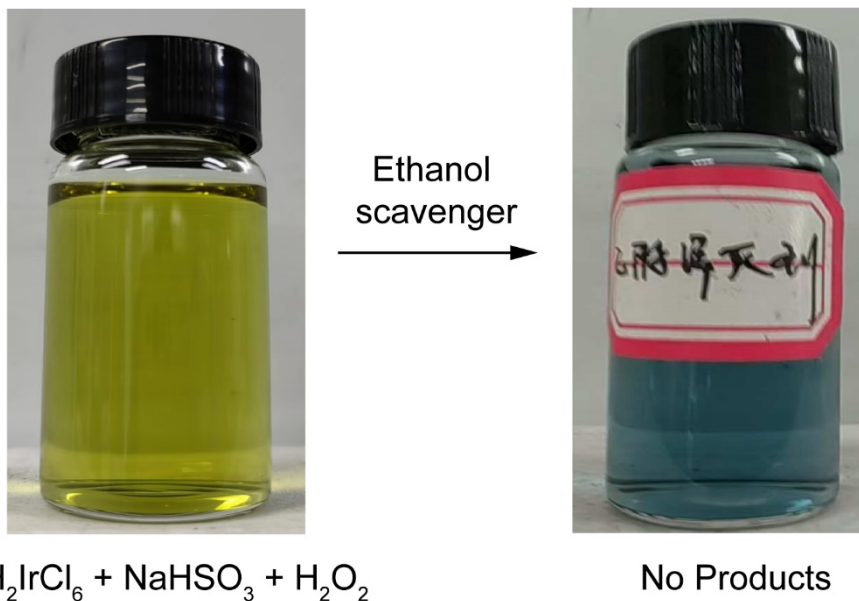

Fig. S4. The ethanol scavenger was introduced into the  $\text{H}_2\text{IrCl}_6$ - $\text{NaHSO}_3$ - $\text{H}_2\text{O}_2$  systems.

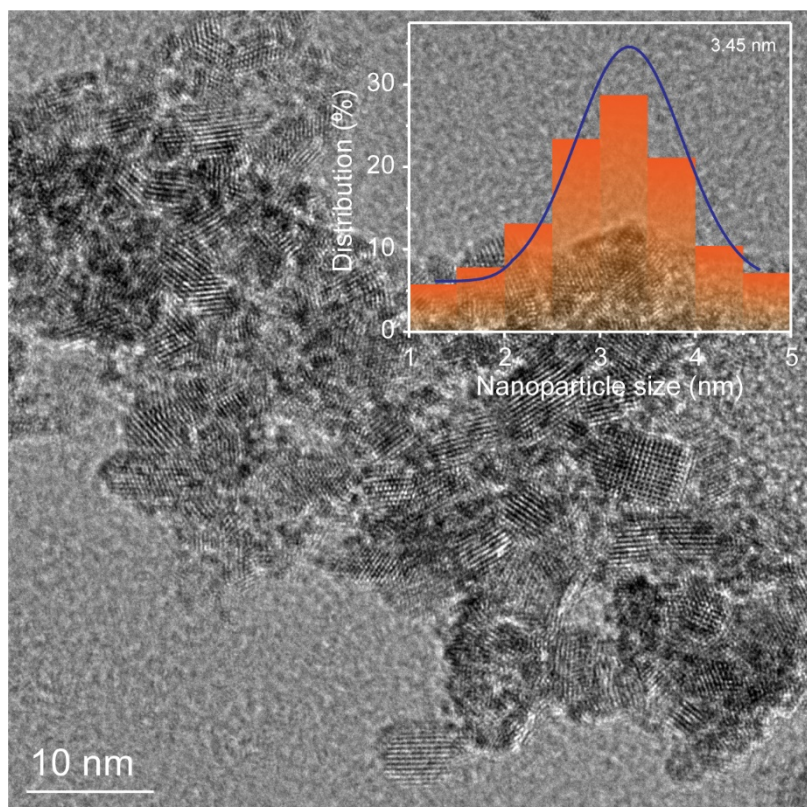

Fig. S5. HRTEM images of IrO<sub>2</sub> (Com.). Inset is the particle size analysis of the IrO<sub>2</sub> (Com.).

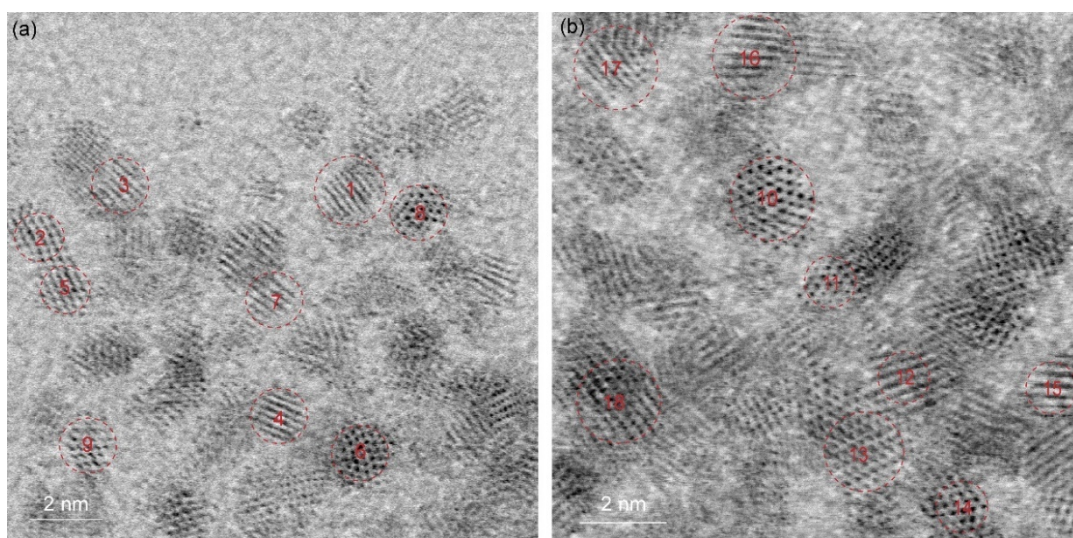

Fig. S6. ABF-STEM images of IrO<sub>2</sub> (Sub-2 nm) catalyst particles used for d-spacing measurements.

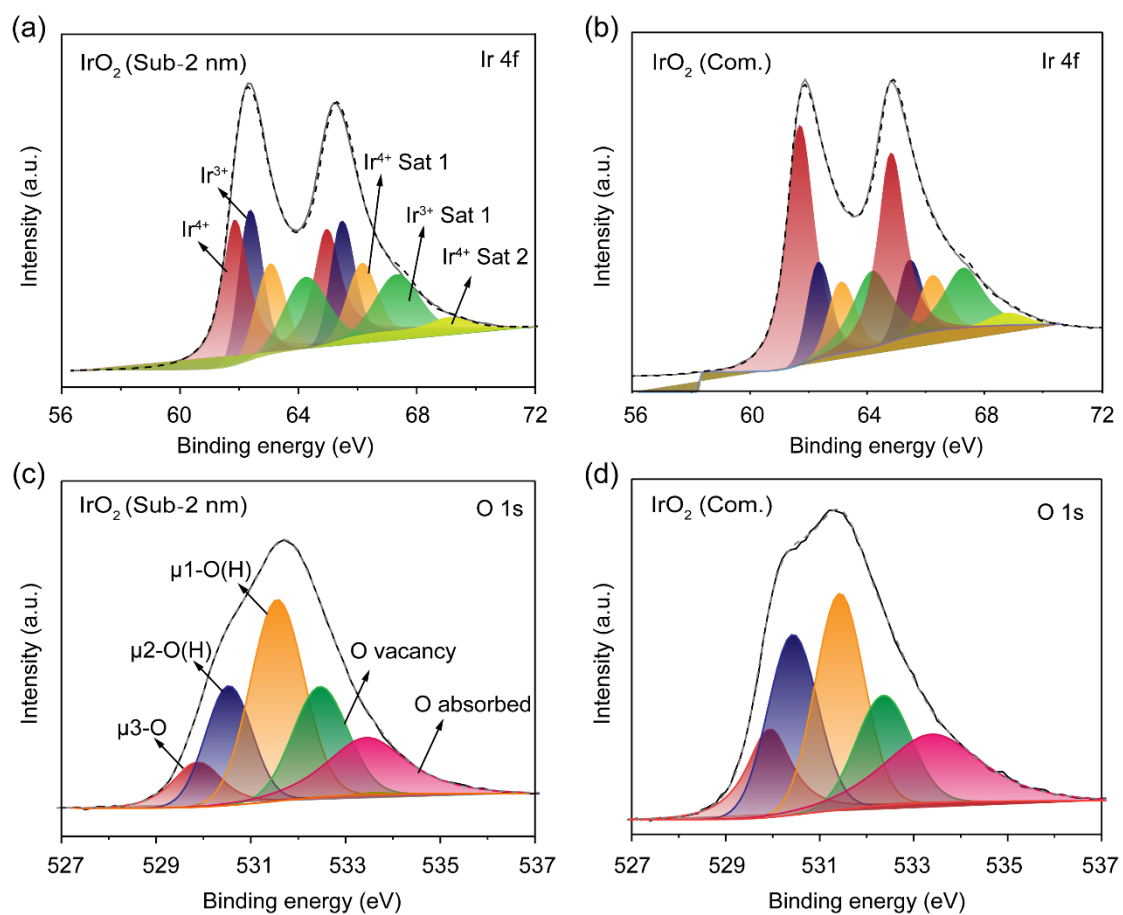

Fig. S7. Ir 4f XPS spectra of (a) IrO<sub>2</sub> (Sub-2 nm) and (b) IrO<sub>2</sub> (Com.) . O1s deconvoluted peaks of (c) IrO<sub>2</sub> (Sub-2 nm) and (d) IrO<sub>2</sub> (Com.).

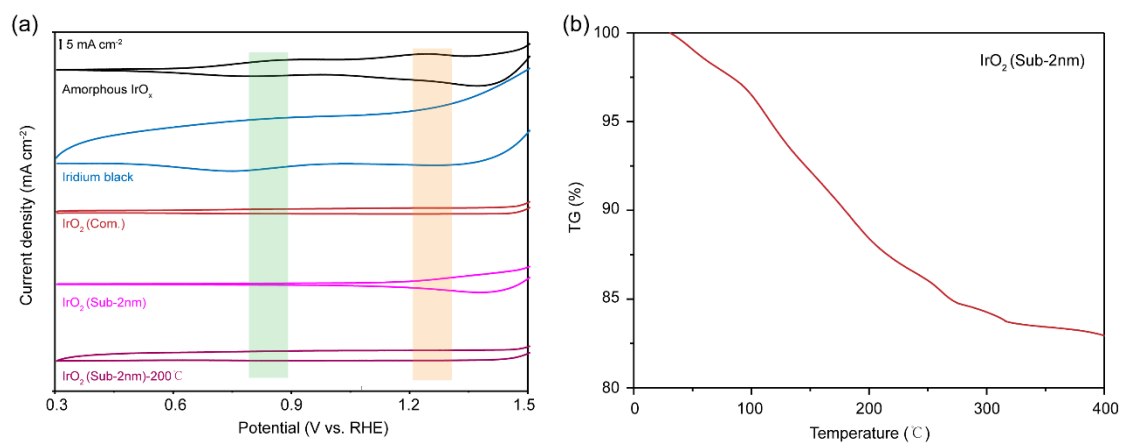

Fig. S8. (a) Cyclic voltammogram of the amorphous IrO<sub>x</sub>, iridium black, IrO<sub>2</sub>(Com.), IrO<sub>2</sub> (Sub-2nm) and IrO<sub>2</sub> (Sub-2nm)-200°C. (b) TG curve of IrO<sub>2</sub> (Sub-2 nm) with a heating rate of 5°C/min under a nitrogen atmosphere.

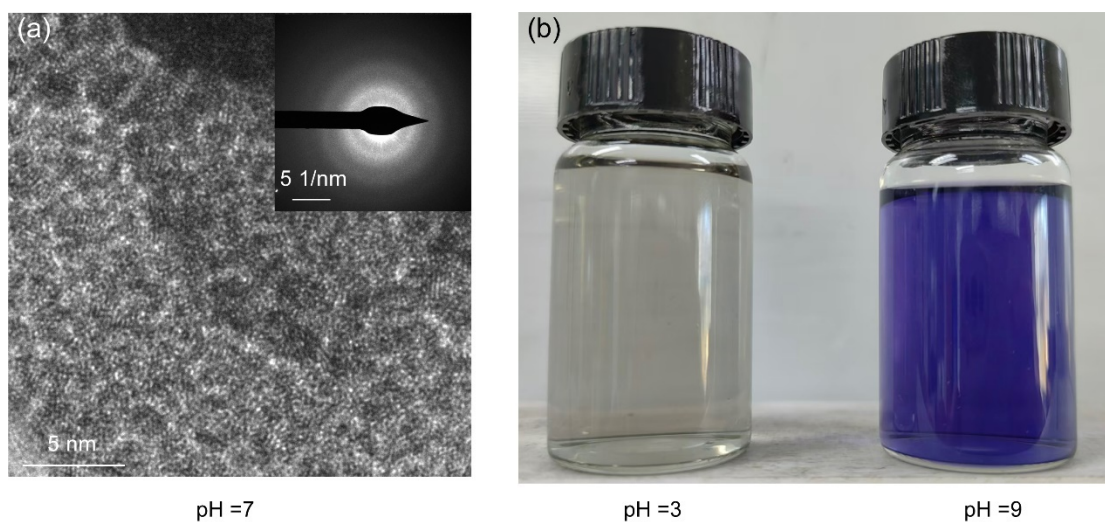

Fig. S9. Effect of pH on the synthesis in the  $\text{H}_2\text{IrCl}_6\text{-NaHSO}_3\text{-H}_2\text{O}_2$  system. (a) HRTEM image of  $\text{IrO}_x$  synthesized at pH=7 (denoted as  $\text{IrO}_x\text{-pH=7}$ ), with the SAED pattern provided in the inset. (b) Photographs of the reaction products taken during synthesis at pH 3 (left) and pH 9 (right).

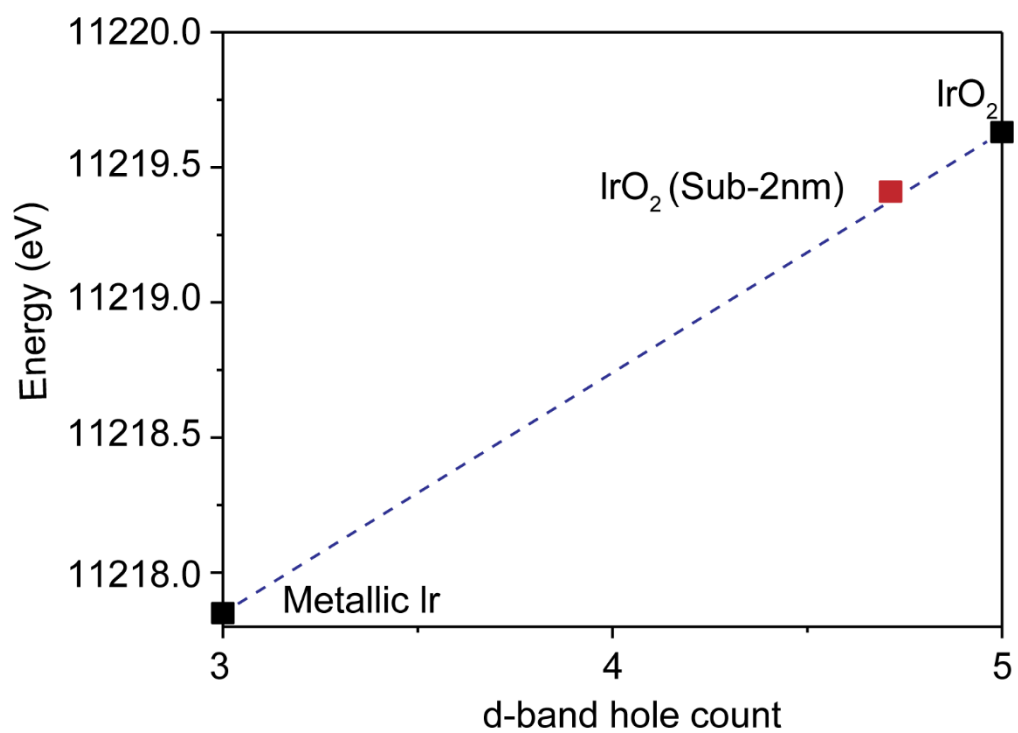

Fig. S10. Function between the position of white line peaks and d-band hole of IrO<sub>2</sub> (Sub-2 nm), IrO<sub>2</sub> and Ir foil.

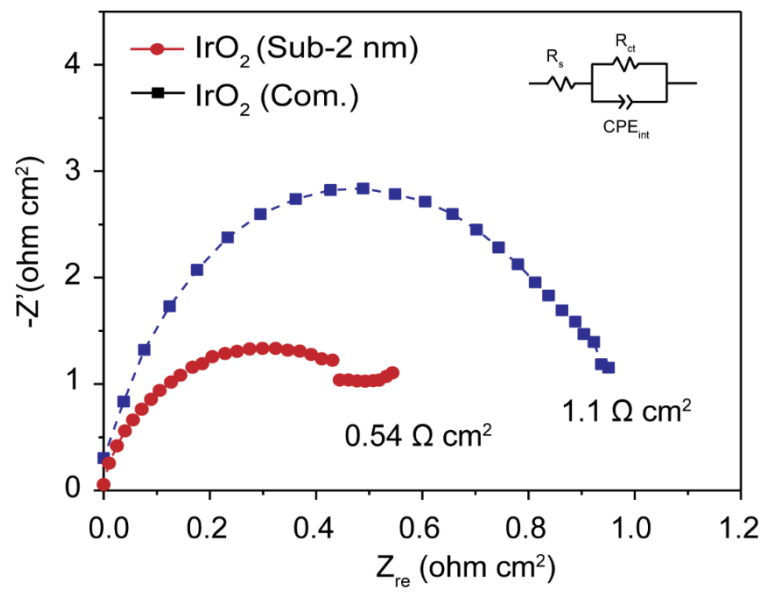

Fig. S11. Nyquist plots at 1.5 V vs RHE of IrO<sub>2</sub> (Sub-2 nm) and IrO<sub>2</sub> (Com.).

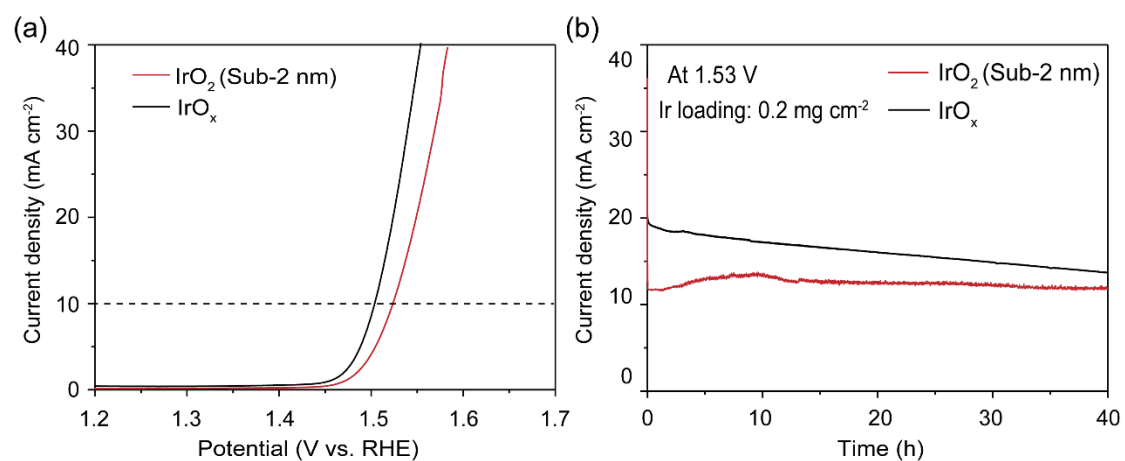

Fig. S12. (a) LSV curves and (b) Chronoamperometry stability tests of  $\text{IrO}_2$  (Sub-2 nm) and  $\text{IrO}_x$ -pH=7.

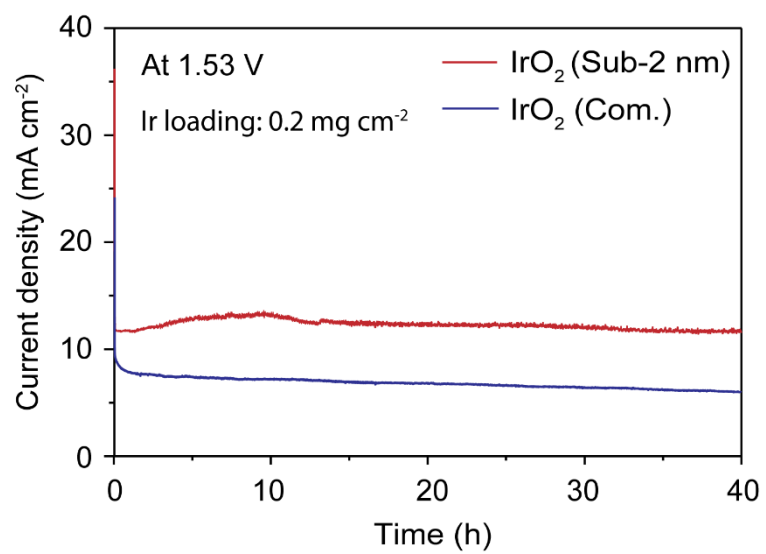

Fig. S13. Chronoamperometry stability tests of IrO<sub>2</sub> (Sub-2 nm) and IrO<sub>2</sub> (Com.) at 1.53 V vs. RHE for 40 h including online 100% iR-correction.

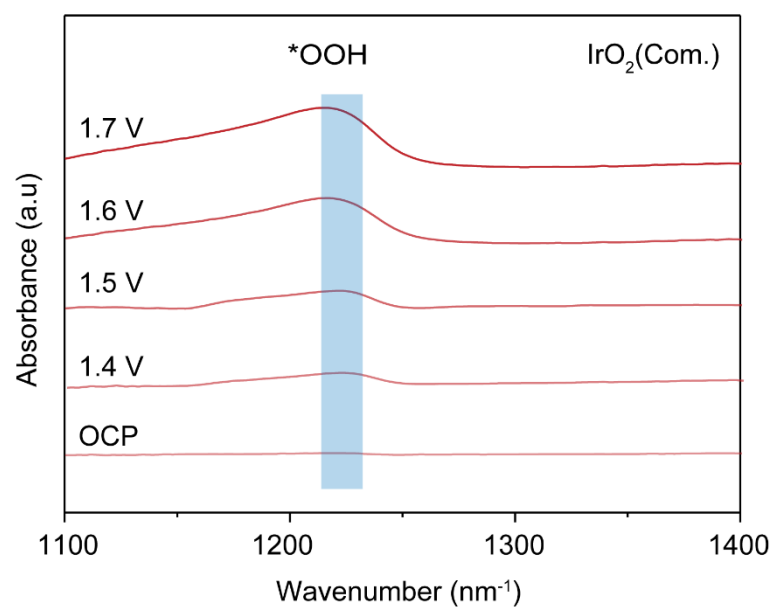

Fig. S14. In situ FTIR spectra of IrO<sub>2</sub> (Com.).

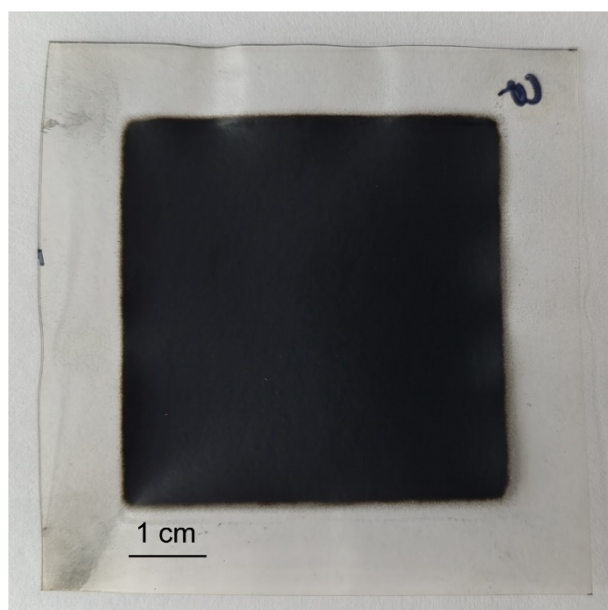

Fig. S15. The optical photo of the membrane electrode assembly.

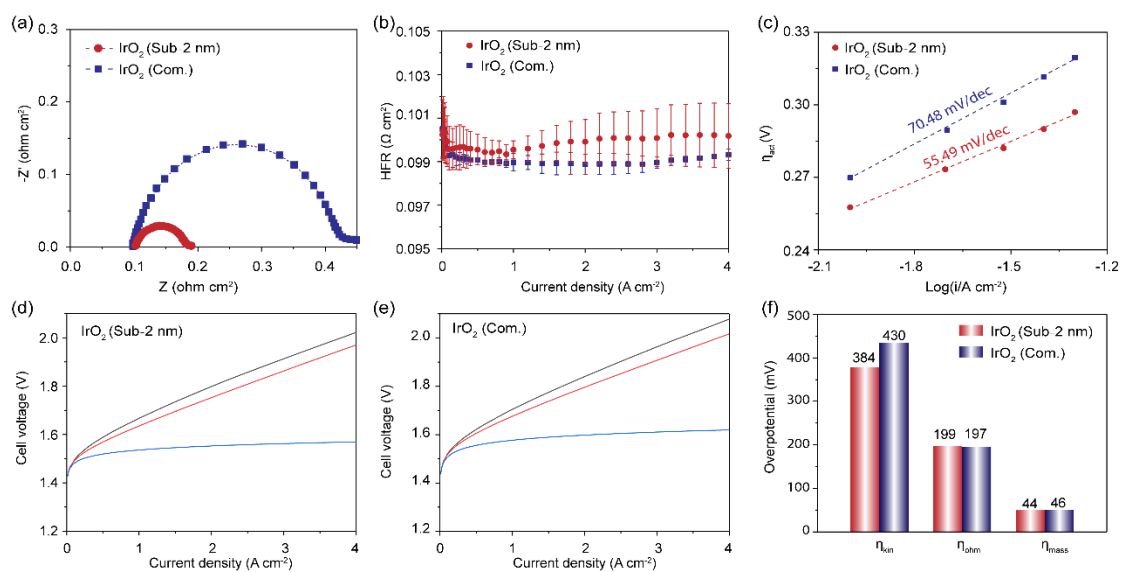

Fig. S16. (a) Nyquist plots at 1.5V, (b) HFR-values vs. current density obtained by electrochemical impedance spectroscopy. (c) Tafel slopes of IrO<sub>2</sub>(Sub-2 nm) and IrO<sub>2</sub> (Com.). (d) Breakdown of ohmic overpotential ( $\eta_{ohm}$ ), kinetic overpotential ( $\eta_{kin}$ ), and transport overpotential ( $\eta_{trans}$ ) of PEMWE single cells using (d) IrO<sub>2</sub>(Sub-2 nm) and (e) IrO<sub>2</sub> (Com.). (f) Comparison of  $\eta_{kin}$ ,  $\eta_{ohm}$  and  $\eta_{mt}$  for IrO<sub>2</sub>(Sub-2 nm) and IrO<sub>2</sub> (Com.) at 2A/cm<sup>2</sup>.

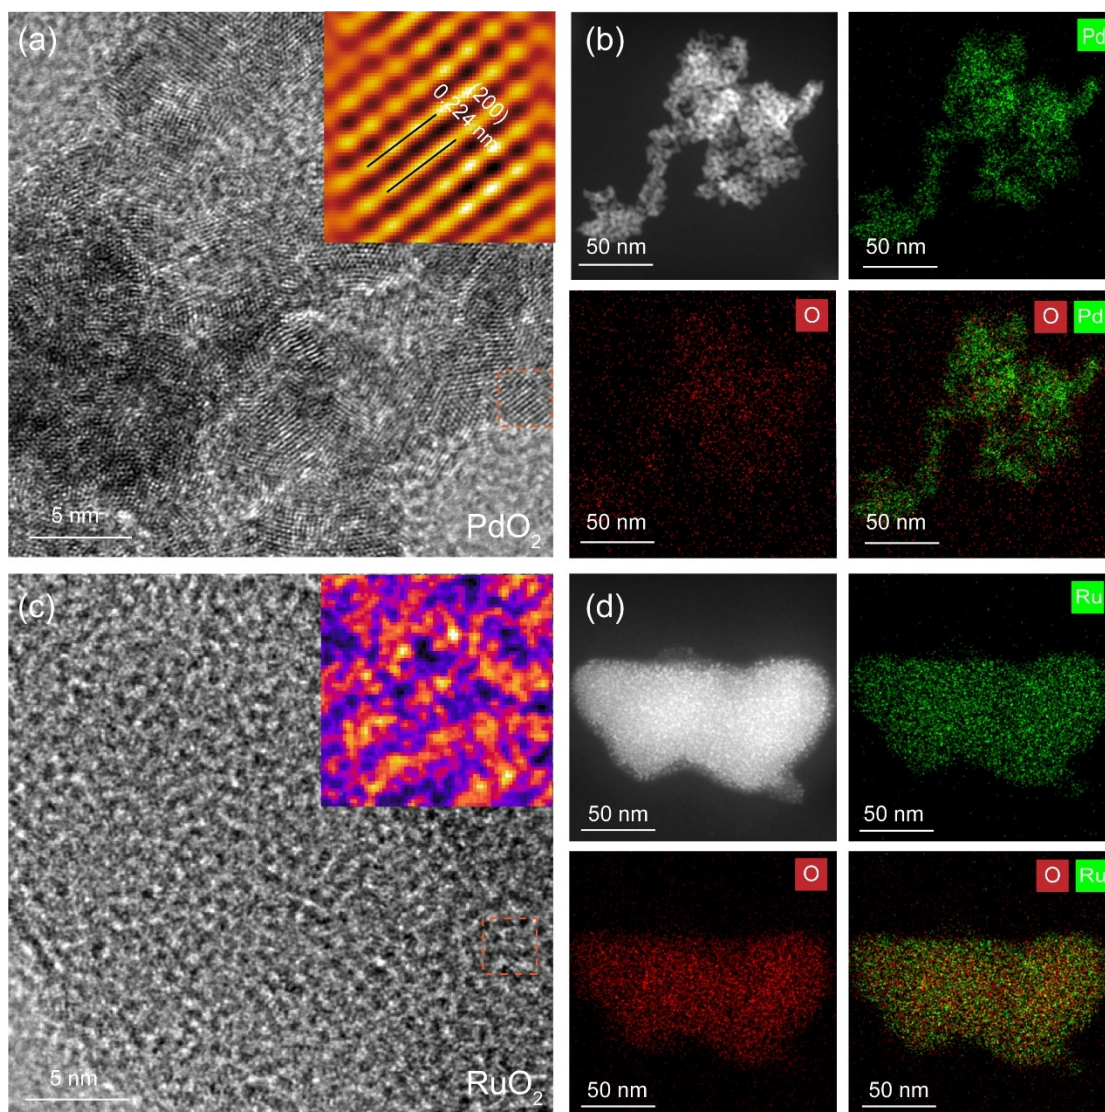

Fig. S17. (a) HRTEM images of  $\text{PdO}_2$  by the same synthesis method. The inset shows IFFT images. (b) HAADF-STEM images and corresponding element mapping images: Pd, O and mix of  $\text{PdO}_2$ . (c) TEM images of  $\text{RuO}_2$  by the same synthesis method. The inset shows IFFT images. (d) HAADF-STEM images and corresponding element mapping images: Ru, O, and mix of  $\text{RuO}_2$ .

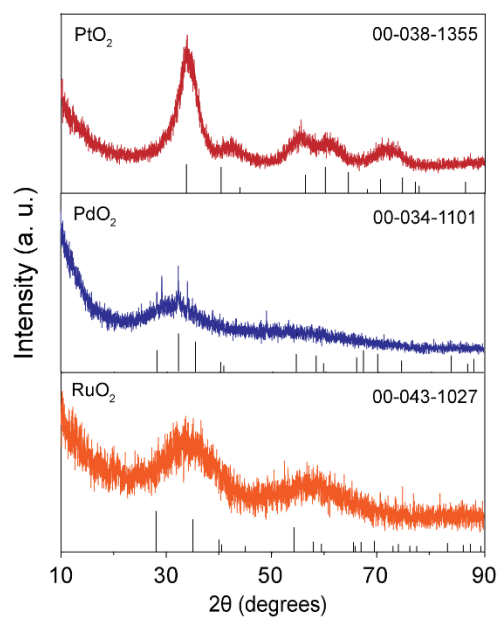

Fig. 18 Powder X-ray diffraction patterns of the  $\text{PtO}_2$ ,  $\text{PdO}_2$  and  $\text{RuO}_2$

Table S1. Lattice spacings measured from TEM images of the IrO<sub>2</sub> (Sub-2nm) for 18 particles and their comparison to the closest matching IrO<sub>2</sub>.

| Particle | Measured<br>d-spacing / Å | Closest <i>d</i> -spacing in<br>tetragonal IrO <sub>2</sub> /Å |
|----------|---------------------------|----------------------------------------------------------------|
| 1        | 2.17                      | 2.25 (200)                                                     |
| 2        | 2.37                      | 2.25 (200)                                                     |
| 3        | 2.38                      | 2.25 (200)                                                     |
| 4        | 2.10                      | 2.01 (210)                                                     |
| 5        | 2.26                      | 2.25 (200)                                                     |
| 6        | 2.48                      | 2.58 (101)                                                     |
| 7        | 2.42                      | 2.58 (101)                                                     |
| 8        | 2.10                      | 2.01 (210)                                                     |
| 9        | 2.31                      | 2.25 (200)                                                     |
| 10       | 2.30                      | 2.25 (200)                                                     |
| 11       | 2.25                      | 2.25 (200)                                                     |
| 12       | 2.49                      | 2.58 (101)                                                     |
| 13       | 2.20                      | 2.25 (200)                                                     |
| 14       | 2.31                      | 2.25 (200)                                                     |
| 15       | 2.68                      | 2.58 (101)                                                     |
| 16       | 2.37                      | 2.25 (200)                                                     |
| 17       | 2.08                      | 2.01 (210)                                                     |
| 18       | 2.48                      | 2.58 (101)                                                     |

| Sample                     | Path  | N <sup>a</sup> | R (Å) <sup>b</sup> | $\sigma^2(\times 10^{-3} \text{ Å}^2)^c$ | E <sub>0</sub> (eV) <sup>d</sup> | R-factor |
|----------------------------|-------|----------------|--------------------|------------------------------------------|----------------------------------|----------|
| Ir foil                    | Ir-Ir | 12             | 2.47+/-0.004       | 4.33+/-2.75                              | -0.57+/-0.67                     | 0.009    |
| IrO <sub>2</sub> (Sub-2nm) | Ir-O  | 5.54(0.61)     | 1.95 (0.01)        | 2.65(1.04)                               | 7.14(1.93)                       | 0.013    |
| IrO <sub>2</sub>           | Ir-O  | 6              | 1.98 (0.01)        | 3.2                                      | 11.3(1.2)                        | 0.0148   |

Table S2. EXAFS fitting parameters of Ir L<sub>3</sub> edge for various samples.

<sup>a</sup>CN, coordination number; <sup>b</sup>R, distance between absorber and backscatter atoms; <sup>c</sup> $\sigma^2$ , Debye-Waller factor to account for both thermal and structural disorders; <sup>d</sup> $\Delta E_0$ , inner potential correction; R factor indicates the goodness of the fit.  $S_0^2$  was fixed to 0.87, according to the experimental EXAFS fit of Ir foil by fixing CN as the known crystallographic value. A reasonable range of EXAFS fitting parameters:  $0.600 < S_0^2 < 1.000$ ;  $CN > 0$ ;  $\sigma^2 > 0 \text{ Å}^2$ ;  $|\Delta E_0| < 15 \text{ eV}$ ; R factor  $< 0.02$ .

Table S3. Comparison of the performance of IrO<sub>2</sub> (Sub-2nm) catalyst with other rutile IrO<sub>2</sub> catalysts reported in the literature.

| NO. | Catalyst                     | Synthesis Method                      | Rutile IrO <sub>2</sub><br>Nanoparticle size | Mass-specific<br>activity | Ref.         |
|-----|------------------------------|---------------------------------------|----------------------------------------------|---------------------------|--------------|
| I   | IrO <sub>2</sub> (Sub-2nm)   | Free Radical<br>Oxidation             | 1.6 nm                                       | 135 A/g<br>@1.53V         | This<br>work |
| 1   | OMCD IrO <sub>2</sub> /ATO   | Organometallic<br>chemical deposition | 1-5 nm                                       | 73 A/g<br>@1.525V         | 1            |
| 2   | IrO <sub>2</sub> PFHT        | Perchlorate Fusion-<br>Hydrothermal   | 2.1 nm                                       | 95A/g<br>@1.525V          | 2            |
| 3   | IrO <sub>2</sub> nanoneedles | Adams fusion                          | 2.0 nm                                       | 61A/g<br>@1.55V           | 3            |
| 4   | Porous IrO <sub>2</sub>      | Adams fusion                          | 1.7 nm                                       | 44A/g<br>@1.525V          | 4            |
| 5   | IrO <sub>x</sub> -400°C      | Sol-gel silica<br>encapsulation       | 3.5 nm                                       | 700 A/g<br>@1.525V        | 5            |

Table S4. Comparison between IrO<sub>2</sub> (Sub-2nm) and other reported catalysts in PEMWE.

| NO. | Catalyst                                                         | Membrane Electrode Assembly                   |          |                                                 | MEA performance                          |                                         | Stability                         | Reference |
|-----|------------------------------------------------------------------|-----------------------------------------------|----------|-------------------------------------------------|------------------------------------------|-----------------------------------------|-----------------------------------|-----------|
|     |                                                                  | Anode<br>(mg <sub>Ir</sub> cm <sup>-2</sup> ) | Membrane | Cathode<br>(mg <sub>Pt</sub> cm <sup>-2</sup> ) | Voltage at<br>2 A cm <sup>-2</sup> , (V) | Activity<br>(A cm <sup>-2</sup> @1.9 V) |                                   |           |
| I   | IrO <sub>2</sub> (Sub-2nm)                                       | 0.3                                           | N115     | 0.1                                             | 1.77                                     | 3.31                                    | 500 h@<br>1 A cm <sup>-2</sup>    | This work |
| II  | IrO <sub>2</sub> (Com.)                                          | 0.3                                           | N115     | 0.1                                             | 1.84                                     | 2.62                                    | /                                 | This work |
| 1   | Ir <sup>VI</sup> -ado<br>(MnO <sub>2</sub> /p-PTL)               | 0.08                                          | N115     | 0.2                                             | 1.77                                     | 3.1                                     | 2700 h@<br>1.8 A cm <sup>-2</sup> | 6         |
| 2   | IrO <sub>2</sub> @TaB <sub>2</sub>                               | 0.15                                          | N115     | 0.25                                            | 1.83                                     | 2.4                                     | 2 h@<br>1 A cm <sup>-2</sup>      | 7         |
| 3   | Ir/B <sub>4</sub> C                                              | 0.5                                           | N115     | 0.4                                             | 1.8                                      | 2.6                                     | 50 h@<br>1 A cm <sup>-2</sup>     | 8         |
| 4   | Ir/Nb <sub>2</sub> O <sub>5-x</sub>                              | 3.0                                           | N115     | 1.0                                             | 1.72                                     | 3.65                                    | 2000 h@<br>2 A cm <sup>-2</sup>   | 9         |
| 5   | Ir <sub>0.7</sub> Ru <sub>0.3</sub> O <sub>2</sub>               | 1.23                                          | N115     | 0.5                                             | 1.850                                    | /                                       | 48 h<br>@1 A cm <sup>-2</sup>     | 4         |
| 6   | Ir/TiO <sub>2</sub> -MoO <sub>x</sub>                            | 0.5                                           | N115     | 0.5                                             | 1.872                                    | /                                       | 50 h<br>@1A cm <sup>-2</sup>      | 10        |
| 7   | Ir/ WO <sub>x</sub> NRs-25                                       | 0.14                                          | N115     | 0.4                                             | 1.95                                     | 1.7                                     | 1000 h<br>@0.5Acm <sup>-2</sup>   | 11        |
| 8   | Ir/W <sub>x</sub> Ti <sub>1-x</sub> O <sub>2</sub><br>(38 wt. %) | 0.4                                           | N115     | 0.4                                             | 1.76                                     | /                                       | 1200 h<br>@1.5Acm <sup>-2</sup>   | 12        |
| 9   | IrO <sub>2</sub> /Ti<br>(50 wt. %)                               | 0.1                                           | N115     | 0.25                                            | 2.1                                      | 1.5                                     | 1000 h<br>@1 Acm <sup>-2</sup>    | 13        |
| 10  | p-L-IrO <sub>2</sub>                                             | 0.56                                          | N115     | 0.2                                             | 1.78                                     | 2.8                                     | 2000 h<br>@1 A cm <sup>-2</sup>   | 14        |
| 11  | Ir <sub>0.6</sub> Sn <sub>0.4</sub> O <sub>2</sub>               | 0.5                                           | N115     | 0.4                                             | 1.963                                    | 1.75                                    | 100 h<br>@1 A cm <sup>-2</sup>    | 15        |
| 12  | IrO <sub>x</sub> -hybrid                                         | 0.2                                           | N115     | 0.5                                             | 1.8                                      | 2.5                                     | /                                 | 16        |
| 13  | IrO <sub>2</sub><br>(SC)                                         | 0.4                                           | N117     | 0.1                                             | 1.85                                     | 2.25                                    | /                                 | 17        |
| 14  | IrO <sub>2</sub><br>(TKK SA100)                                  | 0.17                                          | N117     | 0.2                                             | 1.82                                     | 2.6                                     | /                                 | 18        |
| 15  | IrO <sub>2</sub> @TiN <sub>1+x</sub>                             | 1.2                                           | N117     | 0.4                                             | 1.916                                    | 1.8                                     | 100 h<br>@1 A cm <sup>-2</sup>    | 19        |
| 16  | CrO <sub>2</sub> -0.16IrO <sub>2</sub>                           | 0.59                                          | N117     | 0.6                                             | 1.73                                     | /                                       | 100 h<br>@1 A cm <sup>-2</sup>    | 20        |

|    |                                                   |       |      |      |       |      |                                |    |
|----|---------------------------------------------------|-------|------|------|-------|------|--------------------------------|----|
| 17 | npIr <sub>x</sub> -NS                             | 0.17  | N117 | /    | 1.85  | 2.4  | /                              | 21 |
| 18 | IrO <sub>2</sub><br>(Nanoparticle)                | 2.0   | N117 | 0.2  | 1.95  | 1.75 | /                              | 22 |
| 19 | IrO <sub>2</sub><br>(Nanoparticle)                | 1.99  | N117 | 1.19 | 1.9   | 2    | /                              | 23 |
| 20 | IrRu HNWs                                         | 0.35  | N212 | 0.4  | 1.81  | 2.5  | 240 h@<br>2 A cm <sup>-2</sup> | 24 |
| 21 | DNP-IrNi/Ti                                       | 0.67  | N212 | 0.4  | 1.825 | 3.0  | 50 h<br>@2 A cm <sup>-2</sup>  | 25 |
| 22 | Sr <sub>2</sub> CaIrO <sub>6</sub>                | 0.4   | N212 | 0.4  | 1.81  | 3.15 | 450 h<br>@2 A cm <sup>-2</sup> | 26 |
| 23 | IrO <sub>2</sub> @TiO <sub>2</sub>                | 1.2   | N212 | 0.5  | 1.717 | 4    | /                              | 27 |
| 24 | Ir-NDs/ATO                                        | 1.0   | N212 | 0.4  | 1.916 | 1.8  | /                              | 28 |
| 25 | Ir-Ru (1:3)                                       | 0.158 | N212 | 0.5  | 1.726 | 3.65 | /                              | 29 |
| 26 | W <sub>0.7</sub> Ir <sub>0.3</sub> O <sub>y</sub> | 0.21  | N212 | 0.2  | /     | 0.6  | /                              | 30 |

## Reference

1. Z. S. Rajan, T. Binninger, P. J. Kooyman, D. Susac and R. Mohamed, *Catalysis Science & Technology*, 2020, **10**, 3938-3948.
2. G. C. Moss, T. Binninger, Z. S. Rajan, B. J. Itota, P. J. Kooyman, D. Susac and R. Mohamed, *Small*, 2025, **21**, 2412237.
3. J. Lim, D. Park, S. S. Jeon, C. W. Roh, J. Choi, D. Yoon, M. Park, H. Jung and H. Lee, *Adv. Funct. Mater.*, 2018, **28**, 1704796.
4. M. Faustini, M. Giraud, D. Jones, J. Rozière, M. Dupont, T. R. Porter, S. Nowak, M. Bahri, O. Ersen and C. Sanchez, *Advanced Energy Materials*, 2019, **9**, 1802136.
5. M. Malinovic, P. Paciok, E. S. Koh, M. Geuß, J. Choi, P. Pfeifer, J. P. Hofmann, D. Göhl, M. Heggen and S. Cherevko, *Advanced Energy Materials*, 2023, **13**, 2301450.
6. A. Li, S. Kong, K. Adachi, H. Ooka, K. Fushimi, Q. Jiang, H. Ofuchi, S. Hamamoto, M. Oura and K. Higashi, *Science*, 2024, **384**, 666-670.
7. Y. Wang, M. Zhang, Z. Kang, L. Shi, Y. Shen, B. Tian, Y. Zou, H. Chen and X. Zou, *Nature communications*, 2023, **14**, 5119.
8. J. Islam, S.-K. Kim, P. T. Thien, M.-J. Kim, H.-S. Cho, W.-C. Cho, C.-H. Kim, C. Lee and J. H. Lee, *J. Power Sources*, 2021, **512**, 230506.
9. Z. Shi, J. Li, J. Jiang, Y. Wang, X. Wang, Y. Li, L. Yang, Y. Chu, J. Bai and J. Yang, *Angew. Chem. Int. Ed.*, 2022, **61**, e202212341.
10. E.-J. Kim, J. Shin, J. Bak, S. J. Lee, K. hyun Kim, D. Song, J. Roh, Y. Lee, H. Kim and K.-S. Lee, *Applied Catalysis B: Environmental*, 2021, **280**, 119433.
11. G. Jiang, H. Yu, Y. Li, D. Yao, J. Chi, S. Sun and Z. Shao, *ACS Applied Materials & Interfaces*, 2021, **13**, 15073-15082.
12. S. Zhao, A. Stocks, B. Rasimick, K. More and H. Xu, *J. Electrochem. Soc.*, 2018, **165**, F82.
13. C. Rozain, E. Mayousse, N. Guillet and P. Millet, *Applied Catalysis B: Environmental*, 2016, **182**, 123-131.
14. Z. Xie, X. Liang, Z. Kang, Y. Zou, X. Wang, Y. A. Wu, G. King, Q. Liu, Y. Huang and X. Zhao, *CCS Chemistry*, 2024, 1-13.
15. G. Jiang, H. Yu, J. Hao, J. Chi, Z. Fan, D. Yao, B. Qin and Z. Shao, *Journal of Energy Chemistry*, 2019, **39**, 23-28.
16. F. Hegge, F. Lombeck, E. Cruz Ortiz, L. Bohn, M. von Holst, M. Kroschel, J. Hübner, M. Breitwieser, P. Strasser and S. Vierrath, *ACS Applied Energy Materials*, 2020, **3**, 8276-8284.
17. S. M. Alia, S. Stariha and R. L. Borup, *J. Electrochem. Soc.*, 2019, **166**, F1164-F1172.
18. Z. Taie, X. Peng and D. Kulkarni, *ACS applied materials & interfaces*, 12 (47), 2020.
19. G. Liu, J. Xu, Y. Wang and X. Wang, *Journal of Materials Chemistry A*, 2015, **3**, 20791-20800.

20. S. Ge, R. Xie, B. Huang, Z. Zhang, H. Liu, X. Kang, S. Hu, S. Li, Y. Luo and Q. Yu, *Energy & Environmental Science*, 2023, **16**, 3734-3742.
21. S. Chatterjee, X. Peng, S. Intikhab, G. Zeng, N. N. Kariuki, D. J. Myers, N. Danilovic and J. Snyder, *Advanced Energy Materials*, 2021, **11**, 2101438.
22. Y. Shi, Z. Lu, L. Guo and C. Yan, *Int. J. Hydrogen Energy*, 2017, **42**, 26183-26191.
23. F. Fouda-Onana, M. Chandesris, V. Médeau, S. Chelghoum, D. Thoby and N. Guillet, *Int. J. Hydrogen Energy*, 2016, **41**, 16627-16636.
24. L. Tao, F. Lv, D. Wang, H. Luo, F. Lin, H. Gong, H. Mi, S. Wang, Q. Zhang and L. Gu, *Joule*, 2024, **8**, 450-460.
25. K.-R. Yeo, K.-S. Lee, H. Kim, J. Lee and S.-K. Kim, *Energy & Environmental Science*, 2022, **15**, 3449-3461.
26. M. Retuerto, L. Pascual, J. Torrero, M. A. Salam, Á. Tolosana-Moranchel, D. Gianolio, P. Ferrer, P. Kayser, V. Wilke and S. Stiber, *Nature Communications*, 2022, **13**, 7935.
27. C. Van Pham, M. Bühler, J. Knöppel, M. Bierling, D. Seeberger, D. Escalera-López, K. J. Mayrhofer, S. Cherevko and S. Thiele, *Applied Catalysis B: Environmental*, 2020, **269**, 118762.
28. H.-S. Oh, H. N. Nong, T. Reier, M. Gliech and P. Strasser, *Chemical Science*, 2015, **6**, 3321-3328.
29. T. Hrbek, P. Kúš, Y. Kosto, M. G. Rodríguez and I. Matolínová, *J. Power Sources*, 2023, **556**, 232375.
30. T. Yan, S. Chen, W. Sun, Y. Liu, L. Pan, C. Shi, X. Zhang, Z.-F. Huang and J.-J. Zou, *ACS Applied Materials & Interfaces*, 2023, **15**, 6912-6922.
